# Supplementary material for: Rate of Deceased Kidney Donation From Potential In-Hospital Deaths in the US, 2003-2021
Source: PubMed Central journal article supplement (PMC10928501; doi:10.1001/jamanetworkopen.2024.1865), 2024-03-11
Supplement: jamanetwopen-e241865-s002.pdf [file jamanetwopen-e241865-s002.pdf]

## Data Sharing Statement

Bragg-Gresham. Rate of Deceased Kidney Donation From Potential In-Hospital Deaths in the US, 2003-2021. *JAMA Netw Open*. Published March 11, 2024.

doi:10.1001/jamanetworkopen.2024.1865

### Data

**Data available:** No

### Additional Information

**Explanation for why data not available:** Readers may request these data by request from both the CDC and the SRTR websites.
